# Supplementary material
Source: ML conference proceedings conference paper supplement (https://proceedings.neurips.cc/paper_files/paper/2017/hash/97416ac0f58056947e2eb5d5d253d4f2-Abstract.html)
Supplement: Supplementary file 1 [file 97416ac0f58056947e2eb5d5d253d4f2-Supplemental.zip]

Archive with 1 entries (1 files):
- crank_supplemental_v2.pdf
